# Aberrant Methylation of Gene Associated CpG Sites Occurs in Borderline Personality Disorder

Stefanie Teschler<sup>1</sup>\*, Marek Bartkuhn<sup>1</sup>\*, Natascha Künzel<sup>1</sup>, Christian Schmidt<sup>1</sup>, Steffen Kiehl<sup>1</sup>, Gerhard Dammann<sup>2,3</sup>, Reinhard Dammann<sup>1\*</sup>

**1** Institute for Genetics, Justus-Liebig-University Giessen, Giessen, Germany, **2** Psychiatric Hospital, Spital Thurgau AG, Münsterlingen, Switzerland, **3** Department of Psychiatry, Basel University Medical School, Basel, Switzerland

## Abstract

Borderline personality disorder (BPD) is a complex psychiatric disease with an increased impact in the last years. While the diagnosis and therapy are well established, little is known on the pathogenesis of borderline personality disorder. Previously, a significant increase in DNA methylation of relevant neuropsychiatric genes in BPD patients has been reported. In our study we performed genome wide methylation analysis and revealed specific CpG sites that exhibited increased methylation in 24 female BPD patients compared to 11 female healthy controls. Bead chip technology and quantitative bisulfite pyrosequencing showed a significantly increased methylation at CpG sites of *APBA2* (1.1 fold) and *APBA3* (1.1 fold), *KCNQ1* (1.5 fold), *MCF2* (1.1 fold) and *NINJ2* (1.2 fold) in BPD patients. For the CpG sites of *GATA4* and *HLCS* an increase in DNA methylation was observed, but was only significant in the bead chip assay. Moreover genome wide methylation levels of blood samples of BPD patients and control samples are similar. In summary, our results show a significant 1.26 fold average increase in methylation at the analyzed gene associated CpG sites in the blood of BPD patients compared to controls samples ( $p < 0.001$ ). This data may provide new insights into epigenetic mechanisms underlying the pathogenesis of BPD.

**Citation:** Teschler S, Bartkuhn M, Künzel N, Schmidt C, Kiehl S, et al. (2013) Aberrant Methylation of Gene Associated CpG Sites Occurs in Borderline Personality Disorder. PLoS ONE 8(12): e84180. doi:10.1371/journal.pone.0084180

**Editor:** Anthony W.I. Lo, The Chinese University of Hong Kong, Hong Kong

**Received:** August 16, 2013; **Accepted:** November 12, 2013; **Published:** December 19, 2013

**Copyright:** © 2013 Teschler et al. This is an open-access article distributed under the terms of the Creative Commons Attribution License, which permits unrestricted use, distribution, and reproduction in any medium, provided the original author and source are credited.

**Funding:** Research in Reinhard Dammann's laboratory is funded by Land Hessen (LOEWE) and Deutsche Forschungsgemeinschaft (TRR81). The funders had no role in study design, data collection and analysis, decision to publish, or preparation of the manuscript.

**Competing interests:** The authors have declared that no competing interests exist.

\* E-mail: reinhard.dammann@gen.bio.uni-giessen.de

☉ These authors contributed equally to this work.

## Introduction

Borderline personality disorder (BPD) is a mental disorder characterized by a pervasive pattern of instability in affect regulation, interpersonal relationships, impulse control and self-image [1]. Clinical signs include impulsive aggression, emotional dysregulation, repeated self-injury, and chronic suicidal tendencies, which make BPD patients frequent users of mental-health resources [2,3]. The nine criteria for borderline personality disorder are stated by the Diagnostic and Statistical Manual of Mental Disorders (DSM-IV) [4]. The lifetime prevalence of BPD has been estimated to be about 6% [5]. Additionally, findings showed that BPD was more common in women than in men (about 70% and 30%, respectively) [6]. The disorder often co-occurs with mood, anxiety and substance abuse disorders, and is also associated with other personality disorders. The disorder is characterized by severe psychosocial impairment [7] and a high mortality rate due to suicide. Up to 10% of patients commit suicide, a rate almost 50 times higher than in the general population. Several measures

(semi-structural interviews) are highly reliable in the care of these patients [8-10]. Causal factors for BPD are only partly known, but genetic factors [11-13] and adverse events during childhood, such as physical and sexual abuse [14], contribute to the development of the disorder. Current strategies are focusing on the neurobiological underpinnings of the disorder, functional imaging [15], identifying endophenotypes within this heterogeneous diagnostic category, and the development and dissemination of better and more cost-effective disorder-specific psychotherapeutically treatments and pharmacological interventions [16].

Aberrant epigenetic modifications are associated with altered gene expression and this may contribute to several illnesses including cancer and psychiatric diseases (e.g. major depressions and schizophrenia) [9,17-22]. Epigenetic inactivation of disease related genes is accomplished by increased cytosine methylation at CpG sites and decreased acetylations of histones. Interestingly, several psychiatric diseases (e.g. schizophrenia, major depression, migraine, epilepsy, bipolar disorder) are therapeutically treated with

valproic acid (VPA). Functionally VPA inhibits histone deacetylases and may increase expression of disease-related genes.

For borderline personality disorder the epigenetic regulation of disease-associated genes has not been investigated in detail. In a first study, we have analyzed the DNA methylation pattern of 14 neuropsychiatric genes and found significantly elevated methylation levels of *5-hydroxytryptamine (serotonin) receptor 2A*, *glucocorticoid receptor* gene (*NR3C1*), *monoamine oxidase A* and *B* and *soluble COMT* for BPD patients [9]. Others have confirmed this increased methylation frequency for *NR3C1* and brain-derived neurotrophic factor (BDNF) in BPD [23-25] This data suggests that aberrant epigenetic regulation of neuropsychiatric genes may contribute to pathogenesis of BPD [9].

The aim of this study was to identify novel target genes that may exhibit aberrant DNA methylation frequencies in BPD patients. Therefore we performed genome wide methylation profiling utilizing Illumina's bead chip technology. Significant changes were confirmed by quantitative pyrosequencing. Here we report increased methylation of *APBA2*, *APBA3*, *GATA4*, *KCNQ1*, *MCF2*, *NINJ2* and *TAAR5* at gene-specific CpG sites in female BPD blood samples compared to controls.

## Material and Methods

### BPD patients and controls

Whole blood samples for 24 female BPD patients and 11 female controls were obtained from the Psychiatric Hospital in Münsterlingen, Switzerland. All patients signed informed consent at initial clinical investigation. The study was approved by the local ethic committees (Kantonale Ethikkommission Thurgau and Ethik-Kommission am Fachbereich Medizin Justus-Liebig Universität Gießen). Diagnosis of BPD was established by an experienced psychiatrist (Dr. G. W. Dammann). Clinicopathological parameter of the female patients and controls are summarized in Table 1 and Table S1. Genomic DNA from whole blood was isolated by Nucleo Spin L Blood (Macherey and Nagel, Düren, Germany).

### Infinium HumanMethylation27 BeadChip

For the bead chip array 500 ng of genomic DNA was treated with bisulfite [9] and Infinium bead chip analysis was performed by Life & Brain GmbH (Bonn, Germany). The HumanMethylation27 panel targets CpG sites located within the proximal promoter regions of transcription start sites of 14,475 consensus coding sequences (CCDS) in the NCBI Database (Genome Build 36). This bead chip technology allows researchers to interrogate 27,578 highly informative CpG sites per sample at single-nucleotide resolution. Arrays were hybridized and scanned at Life & Brain GmbH according to the manufacturer's instructions. Relative methylation levels and differential methylation were calculated with default settings in GenomeStudio software (Illumina, San Diego, USA). All subsequent calculations were based on average beta values and DiffScores as extracted from the GenomeStudio analysis. Bead chip methylation data has been deposited at the Gene Expression Omnibus (GEO) repository (GSE52222).

**Table 1.** Summarized data of the analyzed BPD patients and control persons.

|                                  | BPD patients <sup>a</sup> (n=24) | control persons (n=11) |
|----------------------------------|----------------------------------|------------------------|
| female                           | 24                               | 11                     |
| mean age                         | 33 ± 11                          | 32 ± 7                 |
| criteria 1                       | 75% (18/24)                      | -                      |
| criteria 2                       | 54% (13/24)                      | -                      |
| criteria 3                       | 92% (22/24)                      | -                      |
| criteria 4                       | 63% (15/24)                      | -                      |
| criteria 5                       | 88% (21/24)                      | -                      |
| criteria 6                       | 88% (21/24)                      | -                      |
| criteria 7                       | 58% (14/24)                      | -                      |
| criteria 8                       | 63% (15/24)                      | -                      |
| criteria 9                       | 54% (13/24)                      | -                      |
| observed positive diagnosis      | 100% (24/24)                     | -                      |
| acute self injuring behavior     | 63% (15/24)                      | -                      |
| prior self injuring behavior     | 88% (21/24)                      | -                      |
| suicide background               | 83% (20/24)                      | -                      |
| nicotine consumption             | 71% (17/24)                      | 36% (4/11)             |
| alcohol abuse                    | 25% (6/24)                       | -                      |
| additional drug abuse            | 17% (4/24)                       | -                      |
| traumatic experience in the past | 63% (15/24)                      | -                      |

<sup>a</sup> more details are listed in Table S1.

doi: 10.1371/journal.pone.0084180.t001

### Methylation analysis

DNA methylation of *APBA2*, *APBA3*, *GATA4*, *HLCS*, *KCNQ1*, *MCF2*, *NINJ2* and *TAAR5* was determined by bisulfite pyrosequencing [26]. Bisulfite treatment of genomic DNA was done as described previously [9]. For pyrosequencing 100 ng of bisulfite treated DNA was amplified in a reaction buffer containing 0.2 mM dNTP mix, 1.5 mM MgCl<sub>2</sub> and 1.5 U Taq polymerase (InViTek GmbH, Berlin, Germany) for 40 cycles with 10 pmol each of forward and biotinylated reverse primer and sequenced with an internal primer (table S2). Pyrosequencing was performed in PyroMark Q24 according to the PyroMark Gold Q24 Reagents Handbook (Qiagen, Hilden, Germany). Pyrosequencing was done for two to three independent bisulfite reactions and average methylation frequency for each CpG site was calculated.

### Statistical evaluation

Statistical analysis was performed with the two-tailed t-test using Excel Version 14.3.1 (Microsoft Cooperation, Redmond, WA, USA). All reported p-values are considered significant for p<0.05.

## Results

### DNA methylation in BPD patients by 27K bead chip technology

In our previous study we have reported that an increased methylation of CpG sites associated with neuropsychiatric genes occurs in the blood samples of borderline personality disorder (BPD) patients [9]. To reveal novel target sites that

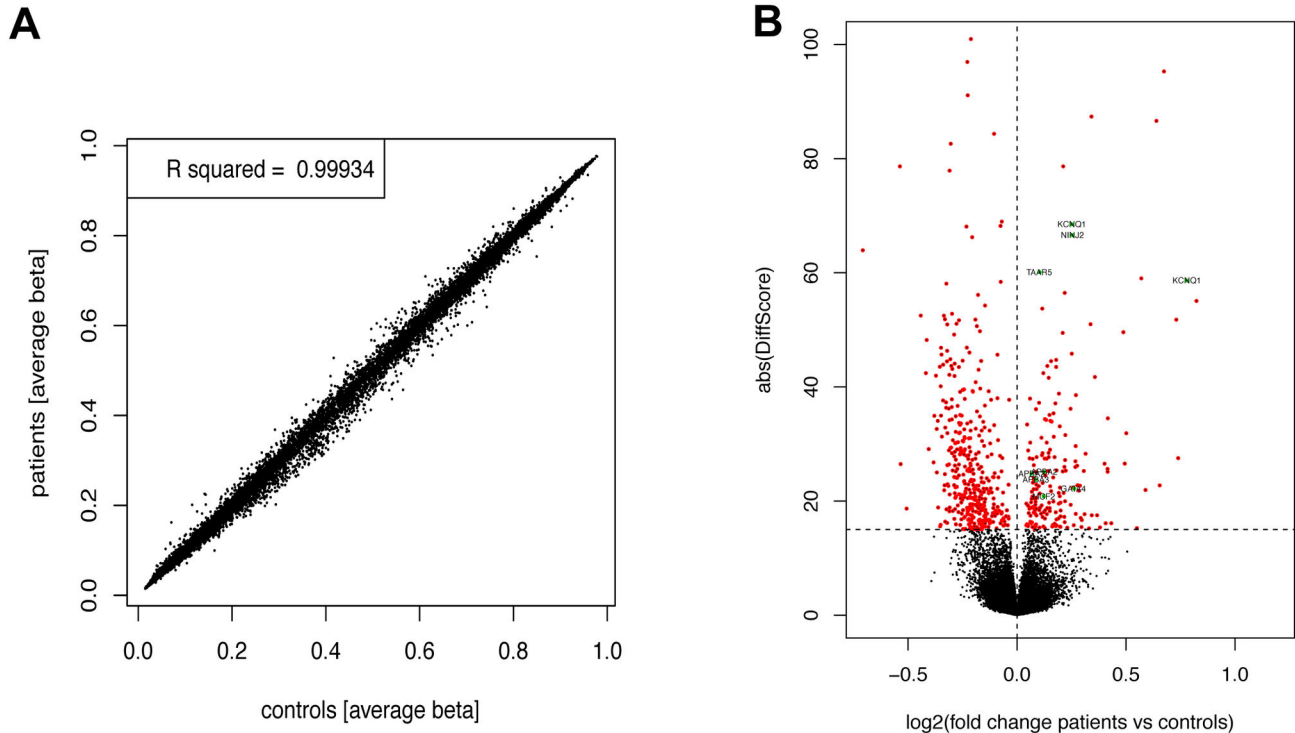

**Figure 1. Methylation rate at 27,578 individual CpG target sites from 24 female BPD patients and 11 female control samples.** Scatter plot of pairwise comparison between female BPD patients and controls (A) and volcano plot for visualization of differentially methylated probes between both groups (B). Methylation levels of 27,578 CpGs sites were revealed by HumanMethylation27 bead chip technology and the average beta-value (beta) and the absolute DiffScore for patients and control groups was determined. Beta is the ratio of the methylated signal to the sum of unmethylated and methylated signal. The DiffScore is a transformation of the p-value that provides directionality to the p-value based on the difference between the average signal in the reference group vs. the comparison group. The formula is:  $\text{DiffScore} = 10 \cdot \text{sgn}(\mu_{\text{cond}} - \mu_{\text{ref}}) \cdot \log_{10} p$ ; For a p-value of 0.05 the DiffScore is  $\sim 13$ . 259 CpGs exhibited a significantly higher DiffScore ( $\geq 13$ ). Analyzed CpGs of *APBA2*, *APBA3*, *GATA4*, *HLCS*, *KCNQ1*, *MCF2*, *NINJ2* and *TAAR5* are indicated.

doi: 10.1371/journal.pone.0084180.g001

exhibit differential DNA methylation levels in the blood of BPD patients, we performed genome wide methylation analysis utilizing the HumanMethylation27 bead chip technology [27]. The methylation rate at 27,578 individual CpG target sites from 24 female BPD patients and 11 female control samples were analyzed on these bead chips. Data were analyzed by scatter plot and volcano plot for visualization of differentially methylated CpG sites (Figure 1). The scatter plot shows a high correlation between methylation levels of female BPD patients and controls ( $R^2=0.99934$ , Figure 1A). However 259 CpG sites exhibited a significant different methylation level in patients (Figure 1B). For further verifications, we have selected several CpGs that show significant higher methylation in patients compared to controls (Figure 1B and Tab. 2). For *holocarboxylase synthetase (HLCS)* and *potassium voltage-gated channel KQT-like subfamily member 1 (KCNQ1)* such an increased methylation (1.75 and 1.72, respectively) was found (Tab. 2). Additionally we found several CpG sites that exhibited only slight but significant increase in DNA methylation (Tab. 2). For the *amyloid beta (A4) precursor protein-binding family A*

*member 2 (APBA2)* and *member 3 (APBA3)* a 1.05 to 1.1 fold increase and for *GATA4* a 1.2 fold increase in CpG methylation was detected. Similar result were observed for CpG sites of the *MCF2 cell line derived transforming sequence (MCF2)*: 1.09, *ninjurin 2 (NINJ2)*: 1.19 and *trace amine associated receptor 5 (TAAR5)*: 1.07 (Tab. 2).

#### Increased methylation of gene associated CpG sites in BPD patients

To validate our bead chip results, we performed quantitative pyrosequencing for *APBA2*, *APBA3*, *GATA4*, *HLCS*, *KCNQ1*, *MCF2*, *NINJ2* and *TAAR5* (Figure 2 and Figure 3). Most identified target CpG sites were located at non-CpG island regions and are depicted in Figure 2. For *APBA2* two target CpG sites and two additional CpGs were analyzed from which two were located at the upper strand (target CpG1.1 and CpG1.2) and two on the complementary lower strand (target CpG2.1 and CpG2.2). For controls the average methylation frequencies were 72% for CpG1.1, 59% for CpG1.2, 65% for CpG2.1 and 72% for CpG2.2 (Figure 3A). In BPD patients

**Table 2.** Differentially methylated CpGs by 27K bead chip and pyrosequencing.

| Gene (Target ID)   | 27K bead chip            |                  | pyrosequencing           |                  |
|--------------------|--------------------------|------------------|--------------------------|------------------|
|                    | Fold change <sup>a</sup> | T-test (p-value) | Fold change <sup>a</sup> | T-test (p-value) |
| APBA2 (cg21917349) | 1.09                     | 0.007            | 1.07                     | 0.05             |
| APBA2 (cg12044210) | 1.05                     | 0.014            | 1.08                     | 0.08             |
| APBA3 (cg20366831) | 1.06                     | 0.031            | 1.08                     | 0.02             |
| GATA4 (cg17795240) | 1.20                     | 0.012            | 1.10                     | 0.47             |
| HLCS (cg27519424)  | 1.75                     | 0.002            | 1.02                     | 0.38             |
| KCNQ1 (cg17820828) | 1.19                     | 0.098            | 1.60                     | 0.001            |
| KCNQ1 (cg19728223) | 1.72                     | 0.008            | n.a.                     | n.a.             |
| MCF2 (cg21557231)  | 1.09                     | 0.025            | 1.10                     | 0.02             |
| NINJ2 (cg20781967) | 1.19                     | 0.0007           | 1.17                     | 0.001            |
| TAAR5 (cg17829936) | 1.07                     | 0.057            | 1.05                     | 0.13             |

<sup>a</sup> methylation of patients versus controls, n.a. not analyzed

doi: 10.1371/journal.pone.0084180.t002

increased frequencies were observed: 77%, 67%, 71% and 77%, respectively (Figure 3A). Thus in average a significant higher methylation of 5.6% was observed in BPD (72.9%) compared to controls (67.3%) and a 1.08 fold higher methylation was found ( $p < 0.05$ ; Figures 3A and 4). Similar results were also found for the two CpG sites (target CpG1 and CpG2) analyzed in the coding region of *APBA3* (Figure 2 and Figure 3A). In controls CpG1 showed 71% and CpG2 66% methylation and a significant 5.6% increase was found for BPD patients (77% and 72%, respectively). In average we observed a 1.08 fold increase in methylation of *APBA3* in BPD patients (74.3%) compared to controls (68.7%; Figures 3A and 4).

For *GATA4* methylation was higher in BPD patients (24%) compared to controls (21%), however this increase (1.1) was not significant (Figures 3B and 4). In the bead chip analysis the highest methylation change (1.75 fold increase in BPD) was found for *HLCS* (Tab. 2). However, our pyrosequencing results show only minor changes at the target CpG site (Figure 3B). In BPD patients 96% and in controls 94% methylation and this 2% increase (1.02 fold change) in BPD was not significant (Figures 3B and 4). The methylation of the target CpG of *MCF2* was higher in BPD patients (58%) compared to controls (53%) and this 1.1 fold increase was significant ( $p = 0.02$ ; Figures 3B and 4). Similar results were also found for *NINJ2* (Figures 2 and 3). The target CpG of *NINJ2* showed significantly higher (1.17 fold;  $p < 0.001$ ) methylation in BPD patients (62%) compared to controls (53%; Figures 3B and 4). For *TAAR5* an increased methylation was observed in BPD patients (88%) compared to controls (84%), however this 1.05 fold increase was insignificant (Figures 3B and 4).

Next we analyzed seven CpGs in the coding region of *KCNQ1*. For controls the average methylation levels were 21% for CpG1, 32% for CpG2, 21% for CpG3, 37% for CpG4, 28% for CpG5, 24% for CpG6 and 19% for CpG7 (Figure 3C). In BPD patients significant higher levels were observed at all CpGs: 33%, 49%, 33%, 53%, 44%, 37% and 29%, respectively (Figure 3C). Thus, in average a significant 14% higher methylation was observed in BPD (40%) compared to controls

(26%) and a 1.54 fold higher rate was calculated ( $p < 0.001$ ; Figures 3C and 4).

In figure 4 the fold increase of methylation levels in BPD patients compared to controls is plotted. Our data indicate increased methylation frequencies at all 18 analyzed CpGs and the average methylation level was significantly 1.26 fold higher in BPD patients ( $p < 0.001$ ). Aberrant methylation was not significantly associated with a specific individual or with a personality trait (e.g. traumatic experience or drug abuse). Interestingly our pyrosequencing data showed with exception of *HLCS*, a similar increase in DNA methylation compared to the bead chip analysis for most of the analyzed CpGs (Figure 4 and Tab. 2).

To analyze if aberrant methylation of target CpG sites correlates with altered gene expression, we utilized human cells, which were treated with 5-aza-2'-deoxycytidine, a potent inhibitor of DNA methyltransferases [28]. After four days of treatment methylation levels at two CpG sites (CpG1.1 and CpG2.1) of *APBA2* and CpG1 of *APBA3* were investigated by bead chip assay and gene expression of *APBA2* and *APBA3* was analyzed by quantitative RTPCR (Figure S1). Methylation analysis revealed a decreased methylation of *APBA2* (15%; 0.84 fold) and *APBA3* (3%; 0.97 fold) compared to untreated control cells (Figure S1A). In parallel expression of *APBA2* and *APBA3* was increased by 1.25 and 1.12 fold, respectively (Figure S1B). Similar results were also observed for other genes (e.g. *NINJ2*; data not shown). These data suggest that small variations in DNA methylation correlate with relevant changes in expression of *APBA2* and *APBA3*. In summary our results indicate an increase in DNA methylation in samples of BPD patients compared to controls at several gene specific CpG sites and this may lead to a decreased expression of the respective genes.

## Discussion

In our study we aimed to reveal novel gene associated CpG sites that exhibit aberrant DNA methylation in borderline personality disorder (BPD). Thus we performed a genome wide methylation screen utilizing the HumanMethylation27 bead chip technology [27,29]. By this unbiased approach we identified several CpG sites, which exhibited significantly increased methylation in the blood of BPD patients compared to controls (Table 2). This increased methylation was confirmed by quantitative pyrosequencing for *APBA2* (1.08 fold), *APBA3* (1.08 fold), *GATA4* (1.1 fold), *KCNQ1* (1.54 fold), *MCF2* (1.10 fold), *NINJ2* (1.17 fold) and *TAAR5* (1.05 fold) (Figure 4). Only for *HLCS* the 1.75 fold increased methylation was not confirmed by pyrosequencing (Tab. 2). In our previous work we have reported that increased methylation of 5-hydroxytryptamine (serotonin) receptor 2A (1.24 fold), glucocorticoid receptor gene (*NR3C1*) (1.22 fold), monoamine oxidase A (1.05 fold), monoamine oxidase B (1.08 fold) and soluble COMT (1.07 fold) occurs in BPD [9]. Thus our data show a similar increased methylation rate in the blood of BPD patients as observed previously for certain genomic regions.

To confirm that this difference in methylation is of biological significance we have performed expression and methylation

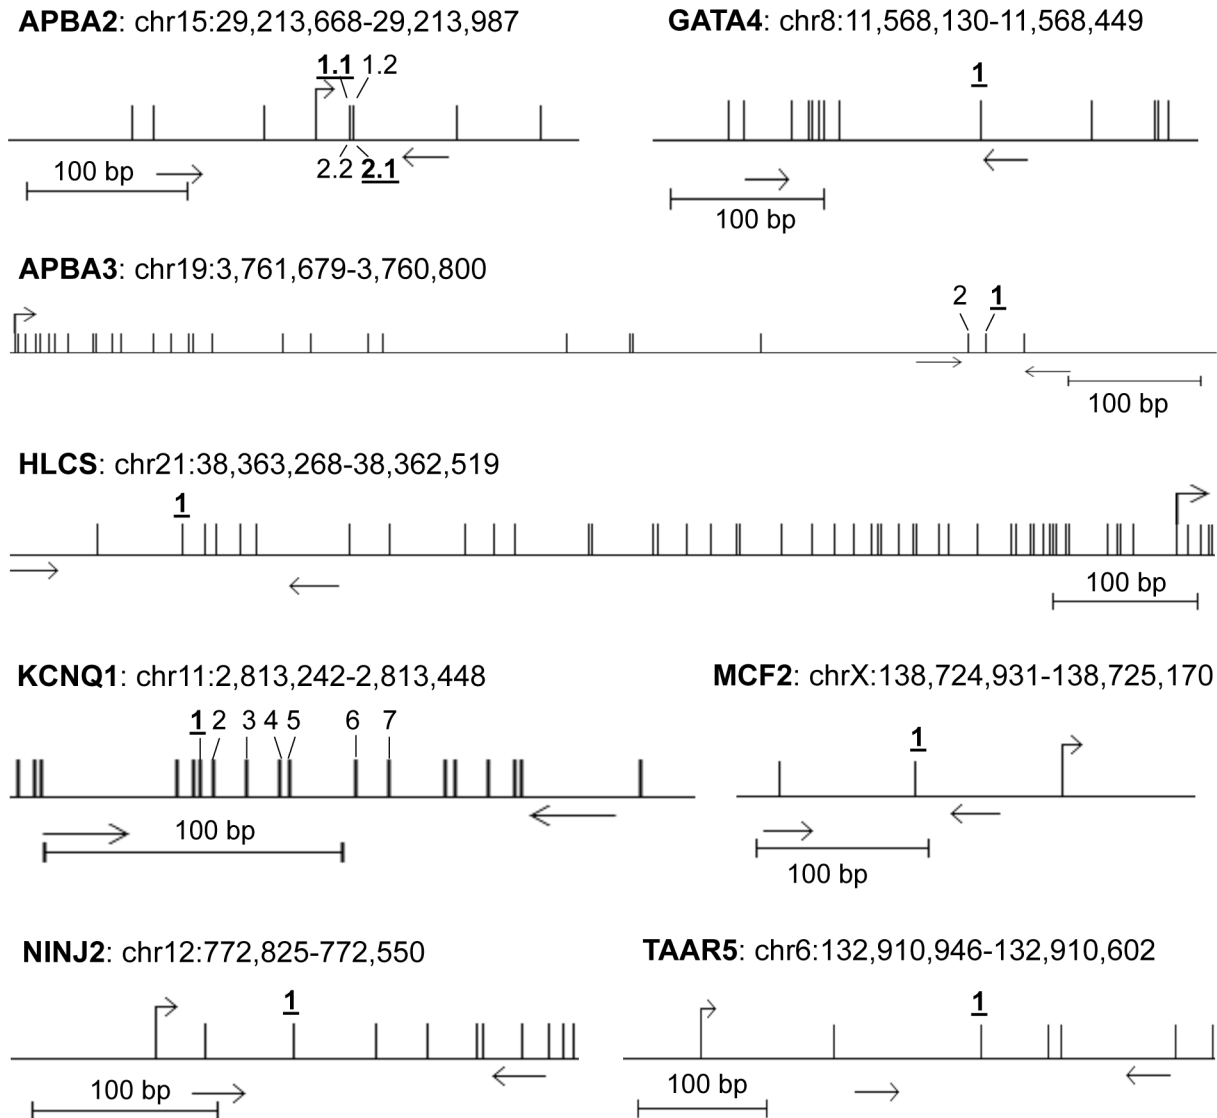

**Figure 2. Map of the investigated genomic regions.** Positions of the analyzed CpG sites of *APBA2*, *APBA3*, *GATA4*, *HLCS*, *KCNQ1*, *MCF2*, *NINJ2* and *TAAR5* are shown (<http://genome.ucsc.edu>). CpGs are indicated with vertical lines and the analyzed CpGs are numbered. The bold and underlined CpG sites were identified as differentially methylated in the 27K bead chip assay. Primers and transcriptions start sites are marked with arrows. Graphics were generated with the python.vs.cobra program (<https://launchpad.net/python.vs.cobra>).

doi: 10.1371/journal.pone.0084180.g002

analysis of *APBA2* and *APBA3* in human cells (Figure S1). We revealed that a decrease of 0.84 and 0.97 fold in methylation levels correlated with an increase of 1.25 and 1.12 fold in mRNA levels of *APBA2* and *APBA3*, respectively. This data suggests that small differences in DNA methylation result in differential expression of the respective genes. Others have also observed a relationship between increased methylation of regulatory regions of rDNA and reduced rRNA expression in the hippocampus of suicide subjects [30]. For ethical reasons brain samples were not available in our study and therefore we utilized blood samples of female BPD patients and controls.

*APBA2* and *APBA3* are both neuronal adaptor proteins, which are also termed MINT2/X11-Beta and MINT3/X11L2 (MINT; methylated in tumors). Aberrant methylation of *APBA2/MINT2* and *APBA3/MINT3* were not previously reported in psychiatric disease however frequently observed in cancer [31]. Thus these genes may represent sites that are frequently targeted by DNA methyltransferases for aberrant DNA methylation. Functional over-expression of *APBA1/X11-Beta* has been shown to decrease the production of amyloid- $\beta$ , a toxic peptide deposited in Alzheimer's disease brains [32]. *APBA/X11* interaction with  $\beta$ -Amyloid precursor protein (APP)

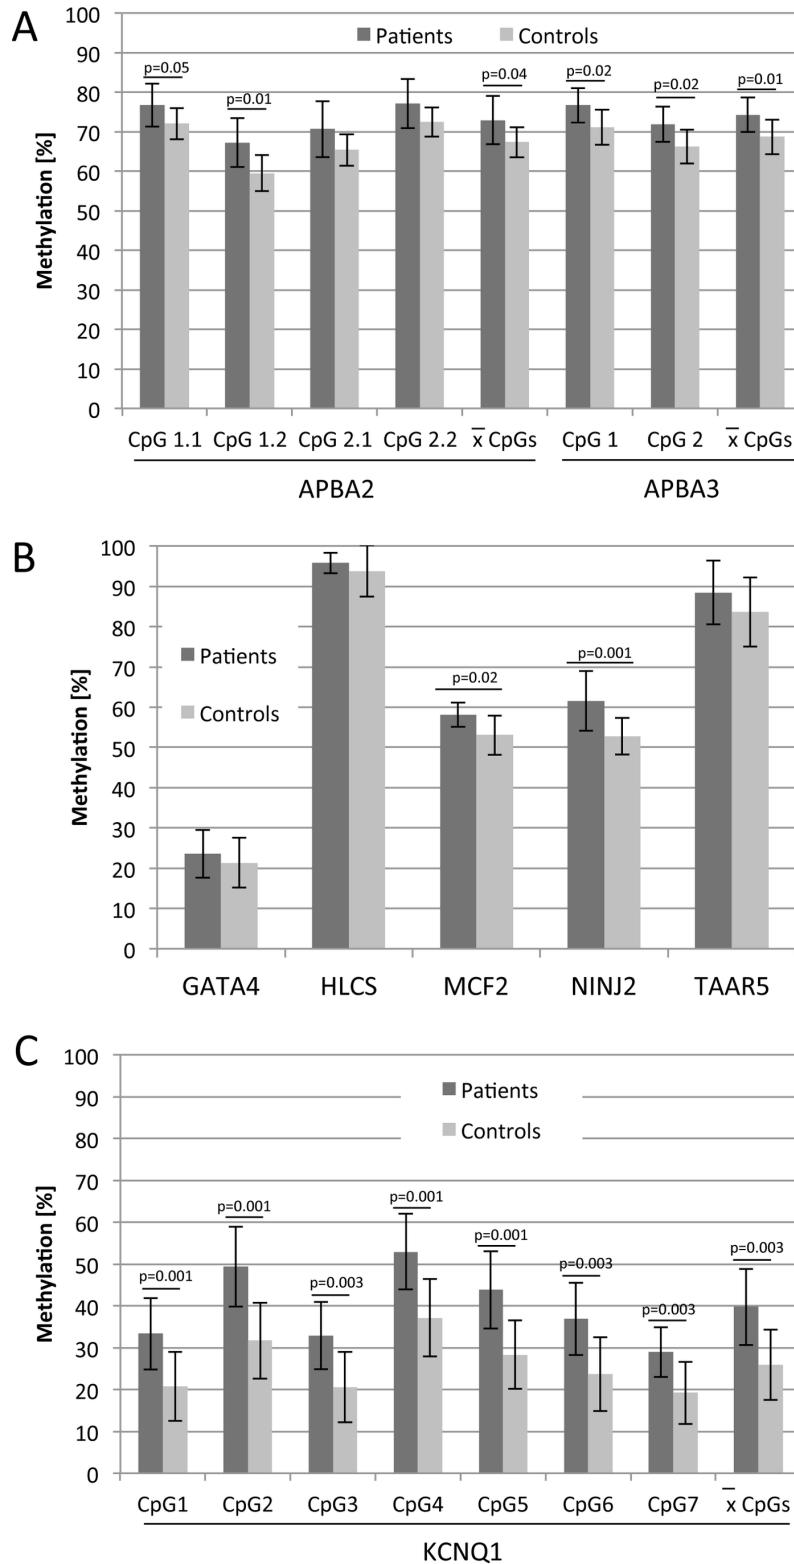

**Figure 3. Methylation analysis of APBA2, APBA3, GATA4, HLCS, KCNQ1, MCF2, NINJ2 and TAAR5 by bisulfite pyrosequencing.** PCR products obtained from three independent bisulfite treated DNA of female BPD patients (n=9) and controls (n=8) were analyzed. Average methylation levels  $\pm$  SD of individual CpG sites from three independent pyrosequencing reactions are indicated and summarized for all CpGs. Significant p-values are indicated (two-tailed t-test).

doi: 10.1371/journal.pone.0084180.g003

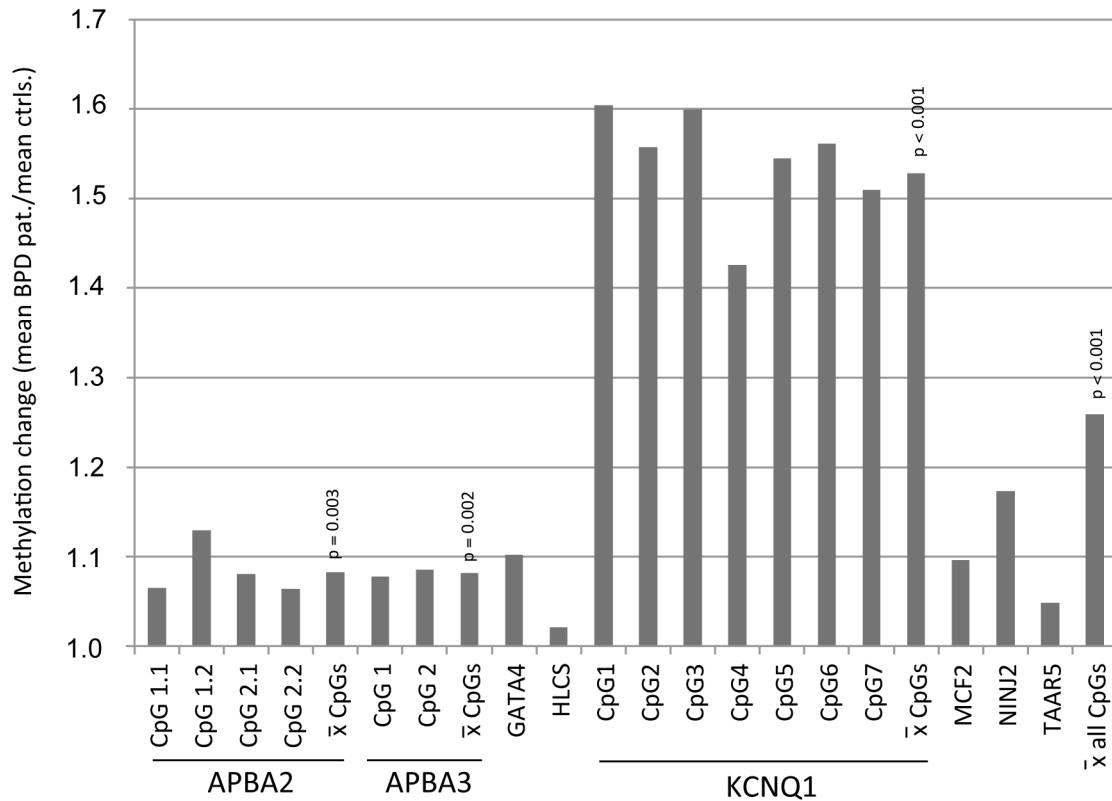

**Figure 4. Methylation changes between female BPD patients and controls.** The quotient between mean methylation levels at individual CpG sites and combined sites for *APBA2*, *APBA3*, *GATA4*, *HLCS*, *KCNQ1*, *MCF2*, *NINJ2* and *TAAR5* in BPD patients and controls were calculated and plotted. P-values are indicated (two-tailed t-test).

doi: 10.1371/journal.pone.0084180.g004

modulates its cellular stabilization and reduces amyloid  $\beta$ -protein secretion [33]. *APBA2* and *APBA3* encode transactivators that regulate the APP signaling network [32,34]. Hypermethylation of CpG sites at the *APBA2* promoter suppressed its activity [35]. Our expression analyses also suggest that an increased methylation of the analyzed CpGs correlates with a reduced expression of *APBA2* and *APBA3* (Figure S1). Thus it is tempting to speculate that epigenetic alteration of *APBA2* and *APBA3* may contribute to borderline personality disorder.

Additionally we identified a CpG site of *NINJ2* that exhibit 1.2 fold hypermethylation in BPD samples. *NINJ2* is a novel homophilic adhesion molecule, which is expressed in mature sensory and enteric neurons [36]. *NINJ2* promotes neurite outgrowth from primary cultured dorsal root ganglion neurons, presumably via homophilic cellular interactions [36]. It is interesting to note that genetic variants of *NINJ2* have been associated with a decreased risk of Alzheimer's disease [37]. A recent study has shown that common psychosocial stressors in women related to longstanding distress and increased risk of Alzheimer's disease [38]. However a correlation between BPD and Alzheimer's disease has not been reported yet.

Trace amine-associated receptors (TAAR) are a distinct subfamily within the family of G protein-coupled receptors and

consist of nine TAAR members in mammals [39]. *TAAR* genes are selectively expressed in the olfactory epithelium [40]. Mouse *Taar3*, *Taar4* and *Taar5* recognize volatile amines found in urine: *Taar4* detects a compound linked to stress, whereas *Taar3* and *Taar5* detect compounds like pheromones that are enriched in male urine [40]. Rat *Taar1* is stimulated by trace amines and psychoactive substances like MDMA or LSD and activates adenylyl cyclase signaling pathway [41]. For BPD patients substance abuses are commonly observed and deregulated TAARs may alter cellular response to these compounds. In our screen *TAAR1* was not identified as an aberrantly methylated gene. However since only one probe for *TAAR1* is present on our bead chip this site may not be representative for the whole *TAAR1* gene.

The *MCF2/DBL* encodes an oncogenic guanine nucleotide exchange factor that exerts control over some members of the Rho family of small GTPases. Expression of *Mcf2/Dbf1* is mainly found in the brain and the gonads [42]. *Mcf2/Dbf1* knockout mice reportedly display shorter dendrites in distinct populations of *Dbf1*-null cortical pyramidal neurons, which suggest a function for *Mcf2/Dbf1* in dendrite elongation [42,43]. Thus increase methylation of *MCF2* in BPD may have an impact on growth of dendrites. It will be interesting to analyze methylation of *MCF2*

in the brain of suicide victims, however due to ethical issues this was not feasible in our study.

For *GATA4* we found an increase in methylation in BPD patients, however this increase was not significant for the pyrosequencing. *GATA4* encodes a member of the GATA family of zinc-finger transcription factors that recognize the GATA sequence, a motif present in the promoters of many genes. A significant association between *GATA4* and alcohol dependence at the gene level was demonstrated [44]. *GATA4* is thought to regulate genes involved mainly in embryogenesis and in myocardial differentiation and function [45]. Further studies are needed to identify potential causal functional role of *GATA4* contributing to BPD.

The *KCNQ1* gene encodes a voltage-gated potassium channel, which is required for repolarization phase of the cardiac action potential. Mutations of *KCNQ1* are associated with hereditary long QT syndrome 1 and other syndromes [46]. The genomic region of *KCNQ1* exhibits tissue-specific imprinting [47] and in whole blood certain CpGs show 40 to 60% methylation [48]. We observed 25 to 40% methylation, but we have analyzed a different region, which was identified by the bead chip technology. Our result indicates a 1.5 fold increased methylation in blood samples of female BPD patients (Figures 3C and 4). It is interesting to note that we have identified two distinct CpGs by our screen that exhibit hypermethylation (Table 2). Hypermethylation of *KCNQ1* occurs also in the sperm DNA of infertile males [49]. Loss of imprinting has been reported in cancer [50]. Since in our study we have only analyzed samples of women, gender specific variations in DNA methylation due to genomic imprinting may not be relevant for this difference. It will be interesting to dissect the role of aberrant methylation of *KCNQ1* in BPD in further details.

We selected *HLCS* for further analysis since in the bead chip analysis high hypermethylation (1.8 fold) in BPD patients was found (Table 2). However in our pyrosequencing verification this significant increase in methylation could not be confirmed (Figure 3). For flanking CpG sites a slight decrease in methylation was observed in BPD (data not shown). Thus increased methylation of *HLCS* in bead chip was not verified by subsequent analysis and *HLCS* may not represent a target gene that exhibits epigenetic alterations in BPD.

Causal factors for borderline personality disorder are only partly revealed, however genetic factors [11-13] and adverse events during childhood, such as sexual and physical abuse [14], contribute to the pathogenesis of BPD. Other reports have suggested a role for environmentally mediated aversive events in the development of BPD and have found an association between psychotraumatization during childhood and the diagnosis of BPD [51-56]. In a family environment, early maltreatment (neglect and childhood abuse) may be particularly involved in producing long-term epigenetic changes [57]. In mammalian models, postnatal maternal care has been linked to epigenetic alterations by aberrant DNA methylation [58,59] and early adversity was shown to alter the offspring epigenome at the glucocorticoid receptor gene (*NR3C1*) promoter [60]. Previously we have observed increased methylation of *NR3C1* in BPD patients [9]. Due to the low

number of patient samples analyzed in our study, aberrant methylation of the gene specific CpG sites was not significantly associated with any clinicopathological parameter. It will be interesting to analyze a larger cohort of patients and to correlate DNA methylation pattern with early adversity (e.g. maltreatment or child hood abuse), other traumatic experiences or alcohol and drug abuse. In future research it will be also important to investigate in detail if variations in blood cells, medications, physical activity and other conditions (e.g. inflammation, menstrual cycle and contraception) contribute to the observed differences in DNA methylation in blood cells, since these parameters may impact the blood cell population and cell-type specific DNA methylation levels [61,62]. Due to ethical issues the analysis of brain tissue (e.g. hippocampus) was not feasible in our study. It has been suggested that in brain and blood the methylation pattern of catechol-O-methyltransferase and other genes are nearly identical [63,64]. Tissue specific methylation of certain developmental genes has been reported [65,66]. Thus the methylation pattern of blood and brain tissues could be also divergent [65]. It will be important to compare DNA methylation levels in brains of BPD patients and controls.

Here we report that increased methylation of certain gene associated CpG sites significantly occurs in BPD patients. It is interestingly to note that three (*APBA2*, *APBA3* and *NINJ2*) of these genes are correlated with Alzheimer's disease. However progression of BPD to dementia has not been investigated or reported yet. Our results suggest that epigenetic deregulation of several gene associated CpG sites may be attributed to the pathogenesis of BPD.

## Supporting Information

**Figure S1. Expression and demethylation of APBA2 and APBA3.** A. Methylation analysis of APBA2 (cg21917349; CpG 1.1 and cg12044210 ; CpG 2.1) and APBA3 (cg20366831) is shown for the lung cancer cell line A549 after 4 days of aza (5-aza-2'-deoxycytidine) treatment (0 and 5  $\mu$ M). Bisulfite treated DNA was analyzed by Illumina bead chip technology. B. Expression analysis of APBA2 and APBA3 is shown after aza treatment. RNA isolated from A549 cells was analyzed by quantitative RTPCR with primers APBA2RTF1 5'-CCACCTGCCAAGGCATCATCAAG, APBA2RTR1 5'-GCTCAGCAATGCCCCCTCTCATG APBA3RTF1 5'-TGCTCACCGAGGCCTATGGCG, APBA3RTR1, 5'-CCATGGAGGCGAAGGCACAGTG and normalized to GAPDH expression. (TIF)

**Table S1. Clinicopathological parameter of BPD patients.** (DOCX)

**Table S2. Primers for methylation analysis.** (DOCX)



## Author Contributions

Conceived and designed the experiments: RD GD. Performed the experiments: ST MB NK CS SK. Analyzed the data: ST MB

NK CS SK GD RD. Contributed reagents/materials/analysis tools: GD MB. Wrote the manuscript: ST MB GD RD.

## References

- Dammann G, Walter M (2003) Differential diagnosis of psychotic symptoms in adolescents and young adults with borderline personality disorder. *Psychiatr Prax* 30: 304-311. doi:10.1055/s-2003-42163. PubMed: 12970815.
- Leichsenring F, Leibling E, Kruse J, New AS, Leweke F (2011) Borderline personality disorder. *Lancet* 377: 74-84. doi:10.1016/S0140-6736(10)61422-5. PubMed: 21195251.
- Lieb K, Zanarini MC, Schmahl C, Linehan MM, Bohus M (2004) Borderline personality disorder. *Lancet* 364: 453-461. doi:10.1016/S0140-6736(04)16770-6. PubMed: 15288745.
- APA (1994) *Diagnostic and Statistical Manual of Mental Disorders*, fourth edition; Association AP, editor. Washington DC. 886 p
- Grant BF, Chou SP, Goldstein RB, Huang B, Stinson FS et al. (2008) Prevalence, correlates, disability, and comorbidity of DSM-IV borderline personality disorder: results from the Wave 2 National Epidemiologic Survey on Alcohol and Related Conditions. *J Clin Psychiatry* 69: 533-545. doi:10.4088/JCP.v69n0404. PubMed: 18426259.
- Widiger TA, Weissman MM (1991) Epidemiology of borderline personality disorder. *Hosp Community Psychiatry* 42: 1015-1021. PubMed: 1959892.
- Skodol AE, Gunderson JG, McGlashan TH, Dyck IR, Stout RL et al. (2002) Functional impairment in patients with schizotypal, borderline, avoidant, or obsessive-compulsive personality disorder. *Am J Psychiatry* 159: 276-283. doi:10.1176/appi.ajp.159.2.276. PubMed: 11823271.
- Zimmerman M (1994) Diagnosing personality disorders. A review of issues and research methods. *Arch Gen Psychiatry* 51: 225-245. doi:10.1001/archpsyc.1994.03950030061006. PubMed: 8122959.
- Dammann G, Teschler S, Haag T, Altmüller F, Tuzek F et al. (2011) Increased DNA methylation of neuropsychiatric genes occurs in borderline personality disorder. *Epigenetics* 6: 1454-1462. doi:10.4161/epi.6.12.18363. PubMed: 22139575.
- Walter M, Berth H, Selinger J, Gerhard U, Küchenhoff J et al. (2009) The lack of negative affects as an indicator for identity disturbance in borderline personality disorder: a preliminary report. *Psychopathology* 42: 399-404. doi:10.1159/000241196. PubMed: 19776671.
- Siever LJ, Torgersen S, Gunderson JG, Livesley WJ, Kendler KS (2002) The borderline diagnosis III: identifying endophenotypes for genetic studies. *Biol Psychiatry* 51: 964-968. doi:10.1016/S0006-3223(02)01326-4. PubMed: 12062879.
- Skodol AE, Siever LJ, Livesley WJ, Gunderson JG, Pföhl B et al. (2002) The borderline diagnosis II: biology, genetics, and clinical course. *Biol Psychiatry* 51: 951-963. doi:10.1016/S0006-3223(02)01325-2. PubMed: 12062878.
- Torgersen S, Czajkowski N, Jacobson K, Reichborn-Kjennerud T, Røysamb E et al. (2008) Dimensional representations of DSM-IV cluster B personality disorders in a population-based sample of Norwegian twins: a multivariate study. *Psychol Med* 38: 1617-1625. doi:10.1017/S0033291708002924. PubMed: 18275631.
- Soloff PH, Lynch KG, Kelly TM (2002) Childhood abuse as a risk factor for suicidal behavior in borderline personality disorder. *J Pers Disord* 16: 201-214. doi:10.1521/pedi.16.3.201.22542. PubMed: 12136678.
- Kraus A, Esposito F, Seifritz E, Di Salle F, Ruf M et al. (2009) Amygdala deactivation as a neural correlate of pain processing in patients with borderline personality disorder and co-occurrent posttraumatic stress disorder. *Biol Psychiatry* 65: 819-822. doi:10.1016/j.biopsych.2008.10.028. PubMed: 19058793.
- APA (2001) Practice guideline for the treatment of patients with borderline personality disorder. American Psychiatric Association. *Am J Psychiatry* 158: 1-52
- Esteller M (2007) Cancer epigenomics: DNA methylomes and histone-modification maps. *Nat Rev Genet* 8: 286-298. doi:10.1038/nrg2005. PubMed: 17339880.
- Dammann R, Li C, Yoon JH, Chin PL, Bates S et al. (2000) Epigenetic inactivation of a RAS association domain family protein from the lung tumour suppressor locus 3p21.3. *Nat Genet* 25: 315-319. PubMed: 10888881.
- van Vliet J, Oates NA, Whitelaw E (2007) Epigenetic mechanisms in the context of complex diseases. *Cell Mol Life Sci* 64: 1531-1538. doi:10.1007/s00018-007-6526-z. PubMed: 17458502.
- Jones PA, Baylin SB (2007) The epigenomics of cancer. *Cell* 128: 683-692. doi:10.1016/j.cell.2007.01.029. PubMed: 17320506.
- Tsankova N, Renthal W, Kumar A, Nestler EJ (2007) Epigenetic regulation in psychiatric disorders. *Nat Rev Neurosci* 8: 355-367. doi:10.1038/nrn2162. PubMed: 17453016.
- Abdolmaleky HM, Smith CL, Zhou JR, Thiagalingam S (2008) Epigenetic alterations of the dopaminergic system in major psychiatric disorders. *Methods Mol Biol* 448: 187-212. doi:10.1007/978-1-59745-205-2\_9. PubMed: 18370235.
- Perroud N, Paoloni-Giacobino A, Prada P, Olié E, Salzmann A et al. (2011) Increased methylation of glucocorticoid receptor gene (NR3C1) in adults with a history of childhood maltreatment: a link with the severity and type of trauma. *Transl Psychiatry* 1: e59. doi:10.1038/tp.2011.60. PubMed: 22832351.
- Perroud N, Salzmann A, Prada P, Nicastro R, Hoeffli ME et al. (2013) Response to psychotherapy in borderline personality disorder and methylation status of the BDNF gene. *Transl Psychiatry* 3: e207. doi:10.1038/tp.2012.140. PubMed: 23422958.
- Steiger H, Labonté B, Groleau P, Turecki G, Israel M (2013) Methylation of the glucocorticoid receptor gene promoter in bulimic women: Associations with borderline personality disorder, suicidality, and exposure to childhood abuse. *Int J Eat Disord* 46: 246-255. doi:10.1002/eat.22113. PubMed: 23417893.
- Tost J, Gut IG (2007) DNA methylation analysis by pyrosequencing. *Nat Protoc* 2: 2265-2275. doi:10.1038/nprot.2007.314. PubMed: 17853883.
- Bibikova M, Lin Z, Zhou L, Chudin E, Garcia EW et al. (2006) High-throughput DNA methylation profiling using universal bead arrays. *Genome Res* 16: 383-393. doi:10.1101/gr.4410706. PubMed: 16449502.
- Jones PA, Taylor SM (1980) Cellular differentiation, cytidine analogs and DNA methylation. *Cell* 20: 85-93. doi:10.1016/0092-8674(80)90237-8. PubMed: 6156004.
- Bock C, Tomazou EM, Brinkman AB, Müller F, Simmer F et al. (2010) Quantitative comparison of genome-wide DNA methylation mapping technologies. *Nat Biotechnol* 28: 1106-1114. doi:10.1038/nbt.1681. PubMed: 20852634.
- McGowan PO, Sasaki A, Huang TC, Unterberger A, Suderman M et al. (2008) Promoter-wide hypermethylation of the ribosomal RNA gene promoter in the suicide brain. *PLOS ONE* 3: e2085. doi:10.1371/journal.pone.0020285. PubMed: 18461137.
- Rashid A, Shen L, Morris JS, Issa JP, Hamilton SR (2001) CpG island methylation in colorectal adenomas. *Am J Pathol* 159: 1129-1135. doi:10.1016/S0002-9440(10)61789-0. PubMed: 11549606.
- Miller CC, McLoughlin DM, Lau KF, Tennant ME, Rogelj B (2006) The X11 proteins, Abeta production and Alzheimer's disease. *Trends Neurosci* 29: 280-285. doi:10.1016/j.tins.2006.03.001. PubMed: 16545469.
- Sastre M, Turner RS, Levy E (1998) X11 interaction with beta-amyloid precursor protein modulates its cellular stabilization and reduces amyloid beta-protein secretion. *J Biol Chem* 273: 22351-22357. doi:10.1074/jbc.273.35.22351. PubMed: 9712855.
- Swistowski A, Zhang Q, Orcholski ME, Crippen D, Vitelli C et al. (2009) Novel mediators of amyloid precursor protein signaling. *J Neurosci* 29: 15703-15712. doi:10.1523/JNEUROSCI.4351-09.2009. PubMed: 20016085.
- Hao Y, Chai KH, McLoughlin DM, Chan HY, Lau KF (2012) Promoter characterization and genomic organization of the human X11beta gene APBA2. *Neuroreport* 23: 146-151. doi:10.1097/WNR.0b013e32834f1934. PubMed: 22222501.
- Araki T, Milbrandt J (2000) Ninjurin2, a novel homophilic adhesion molecule, is expressed in mature sensory and enteric neurons and promotes neurite outgrowth. *J Neurosci* 20: 187-195. PubMed: 10627596.
- Lin KP, Chen SY, Lai LC, Huang YL, Chen JH et al. (2011) Genetic polymorphisms of a novel vascular susceptibility gene, Ninjurin2 (NINJ2), are associated with a decreased risk of Alzheimer's disease. *PLOS ONE* 6: e20573. doi:10.1371/journal.pone.0020573. PubMed: 21674003.

38. Johansson L, Guo X, Hällström T, Norton MC, Waern M et al. (2013) Common psychosocial stressors in middle-aged women related to longstanding distress and increased risk of Alzheimer's disease: a 38-year longitudinal population study. *BMJ Open* 3: e003142. PubMed: 24080094.
39. Stäubert C, Bösel I, Bohnkamp J, Römpler H, Enard W et al. (2010) Structural and functional evolution of the trace amine-associated receptors TAAR3, TAAR4 and TAAR5 in primates. *PLOS ONE* 5: e11133. doi:10.1371/journal.pone.0011133. PubMed: 20559446.
40. Liberles SD, Buck LB (2006) A second class of chemosensory receptors in the olfactory epithelium. *Nature* 442: 645-650. doi:10.1038/nature05066. PubMed: 16878137.
41. Bunzow JR, Sonders MS, Arttamangkul S, Harrison LM, Zhang G et al. (2001) Amphetamine, 3,4-methylenedioxymethamphetamine, lysergic acid diethylamide, and metabolites of the catecholamine neurotransmitters are agonists of a rat trace amine receptor. *Mol Pharmacol* 60: 1181-1188. PubMed: 11723224.
42. Hirsch E, Pozzato M, Vercelli A, Barberis L, Azzolino O et al. (2002) Defective dendrite elongation but normal fertility in mice lacking the Rho-like GTPase activator Dbl. *Mol Cell Biol* 22: 3140-3148. doi:10.1128/MCB.22.9.3140-3148.2002. PubMed: 11940671.
43. Piton A, Gauthier J, Hamdan FF, Lafrenière RG, Yang Y et al. (2011) Systematic resequencing of X-chromosome synaptic genes in autism spectrum disorder and schizophrenia. *Mol Psychiatry* 16: 867-880. doi:10.1038/mp.2010.54. PubMed: 20479760.
44. Karpyak VM, Winham SJ, Biernacka JM, Cunningham JM, Lewis KA et al. (2012) Association of GATA4 sequence variation with alcohol dependence. *Addict Biol*: ([MedlinePgn:]) PubMed: 22862823.
45. Pikkarainen S, Tokola H, Kerkelä R, Ruskoaho H (2004) GATA transcription factors in the developing and adult heart. *Cardiovasc Res* 63: 196-207. doi:10.1016/j.cardiores.2004.03.025. PubMed: 15249177.
46. Peroz D, Rodriguez N, Choveau F, Baró I, Mérot J et al. (2008) Kv7.1 (KCNQ1) properties and channelopathies. *J Physiol* 586: 1785-1789. doi:10.1113/jphysiol.2007.148254. PubMed: 18174212.
47. Ideraabdullah FY, Vigneau S, Bartolomei MS (2008) Genomic imprinting mechanisms in mammals. *Mutat Res* 647: 77-85. doi:10.1016/j.mrfmmm.2008.08.008. PubMed: 18778719.
48. Adalsteinsson BT, Gudnason H, Aspelund T, Harris TB, Launer LJ et al. (2012) Heterogeneity in white blood cells has potential to confound DNA methylation measurements. *PLOS ONE* 7: e46705. doi:10.1371/journal.pone.0046705. PubMed: 23071618.
49. Hammoud SS, Purwar J, Pflueger C, Cairns BR, Carrell DT (2010) Alterations in sperm DNA methylation patterns at imprinted loci in two classes of infertility. *Fertil Steril* 94: 1728-1733. doi:10.1016/j.fertnstert.2009.09.010. PubMed: 19880108.
50. Tanaka K, Shiota G, Meguro M, Mitsuya K, Oshimura M et al. (2001) Loss of imprinting of long QT intronic transcript 1 in colorectal cancer. *Oncology* 60: 268-273. doi:10.1159/000055328. PubMed: 11340379.
51. Famularo R, Kinscherff R, Fenton T (1991) Posttraumatic stress disorder among children clinically diagnosed as borderline personality disorder. *J Nerv Ment Dis* 179: 428-431. doi:10.1097/00005053-199107000-00007. PubMed: 1869872.
52. Goldman SJ, D'Angelo EJ, DeMaso DR, Mezzacappa E (1992) Physical and sexual abuse histories among children with borderline personality disorder. *Am J Psychiatry* 149: 1723-1726. PubMed: 1443251.
53. Herman JL, Perry JC, van der Kolk BA (1989) Childhood trauma in borderline personality disorder. *Am J Psychiatry* 146: 490-495. PubMed: 2929750.
54. Paris J, Zweig-Frank H, Guzder J (1994) Risk factors for borderline personality in male outpatients. *J Nerv Ment Dis* 182: 375-380. doi:10.1097/00005053-199407000-00002. PubMed: 8021636.
55. Silk KR, Lee S, Hill EM, Lohr NE (1995) Borderline personality disorder symptoms and severity of sexual abuse. *Am J Psychiatry* 152: 1059-1064. PubMed: 7793443.
56. Waller G (1994) Childhood sexual abuse and borderline personality disorder in the eating disorders. *Child Abuse Negl* 18: 97-101. doi:10.1016/0145-2134(94)90099-X. PubMed: 8124602.
57. Gunnar M, Quevedo K (2007) The neurobiology of stress and development. *Annu Rev Psychol* 58: 145-173. doi:10.1146/annurev.psych.58.110405.085605. PubMed: 16903808.
58. Kaffman A, Meaney MJ (2007) Neurodevelopmental sequelae of postnatal maternal care in rodents: clinical and research implications of molecular insights. *J Child Psychol Psychiatry* 48: 224-244. doi:10.1111/j.1469-7610.2007.01730.x. PubMed: 17355397.
59. McGowan PO, Suderman M, Sasaki A, Huang TC, Hallett M et al. (2011) Broad epigenetic signature of maternal care in the brain of adult rats. *PLOS ONE* 6: e14739. doi:10.1371/journal.pone.0014739. PubMed: 21386994.
60. Weaver IC, Cervoni N, Champagne FA, D'Alessio AC, Sharma S et al. (2004) Epigenetic programming by maternal behavior. *Nat Neurosci* 7: 847-854. doi:10.1038/nn1276. PubMed: 15220929.
61. Fish EN (2008) The X-files in immunity: sex-based differences predispose immune responses. *Nat Rev Immunol* 8: 737-744. doi:10.1038/nri2394. PubMed: 18728636.
62. Walsh NP, Gleeson M, Shephard RJ, Gleeson M, Woods JA et al. (2011) Position statement. Part one: Immune function and exercise. *Exerc Immunol Rev* 17: 6-63. PubMed: 21446352.
63. Murphy BC, O'Reilly RL, Singh SM (2005) Site-specific cytosine methylation in S-COMT promoter in 31 brain regions with implications for studies involving schizophrenia. *Am J Med Genet B Neuropsychiatr Genet* 133B: 37-42. doi:10.1002/ajmg.b.30134. PubMed: 15635661.
64. Yuferov V, Nielsen DA, Levran O, Randesi M, Hamon S et al. (2011) Tissue-specific DNA methylation of the human prodynorphin gene in post-mortem brain tissues and PBMCs. *Pharmacogenet Genomics* 21: 185-196. PubMed: 20808262.
65. Schilling E, Rehli M (2007) Global, comparative analysis of tissue-specific promoter CpG methylation. *Genomics* 90: 314-323. doi:10.1016/j.ygeno.2007.04.011. PubMed: 17582736.
66. Dansranjav T, Krehl S, Mueller T, Mueller LP, Schmoll HJ et al. (2009) The role of promoter CpG methylation in the epigenetic control of stem cell related genes during differentiation. *Cell Cycle* 8: 916-924. doi:10.4161/cc.8.6.7934. PubMed: 19221495.
